# Supplementary material for: Fulvic–polyphosphate composite embedded in ZnO nanorods (FA–APP@ZnO) for efficient P/Zn nutrition for peas (Pisum sativum L.)
Source: Royal Society of Chemistry journal article supplement (doi:10.1039/d2ra05480a), 2022-01-01
Supplement: d2ra05480a1.pdf [file d2ra05480a1.pdf]

## Supporting Information

**Title:** Fulvic-Polyphosphate Composite Embedded with ZnO Nanorods (FA-APP@ZnO) for Efficient P/Zn Nutrition on Peas (*Pisum sativum* L.)

**Authors:** Chunxiao Han, Jingxu Yang, Xiaohou Zhou, Peng Yun, Xue Li, Dehua Xu, Yanjun Zhong, Benhe Zhong, Zhengjuan Yan\*, and Xinlong Wang\*

Engineering Research Center of Ministry of Education for Comprehensive Utilization and Clean Process Engineering of Phosphorus Resources, School of Chemical Engineering, Sichuan University, Chengdu 610065, China

\*Corresponding authors:

Zhengjuan Yan: E-mail: zjyan@scu.edu.cn;

Xinlong Wang: E-mail: wangxl@scu.edu.cn;

**Number of pages: 8**

**Number of Figures: 7**

**Number of Tables: 2**

**Number of Texts: 1**

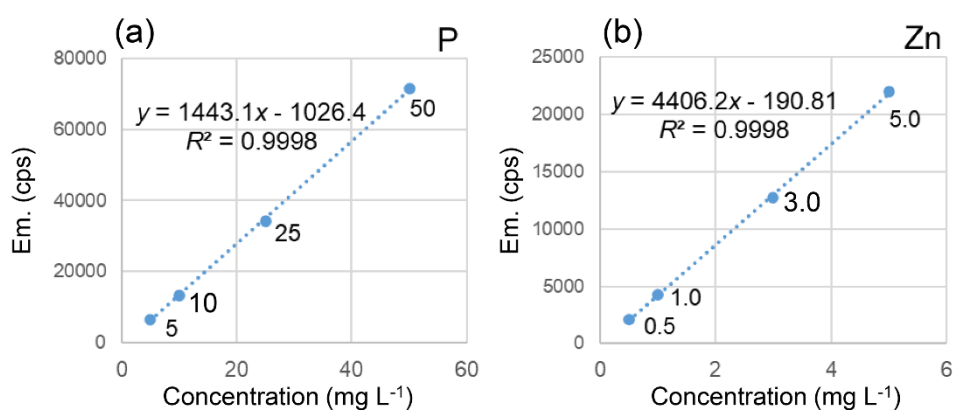

**Figure S1.** The calibration curves and the linearity of the inductively coupled plasma optically emission spectrometry (ICP-OES) for (a) phosphorus (P) and (b) zinc (Zn) determination.

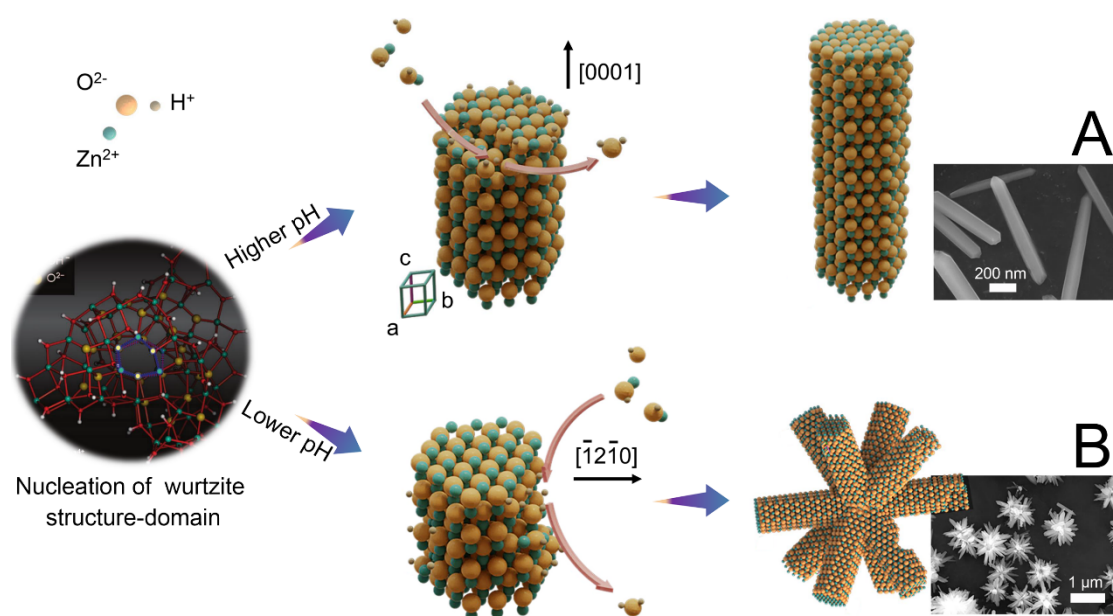

**Figure S2.** Schematic of the differential growth modes of the ZnO crystals under two alkalinity conditions. The far left inset was adapted with permission from ref.<sup>1</sup> Copyright 2008 American Chemical Society.

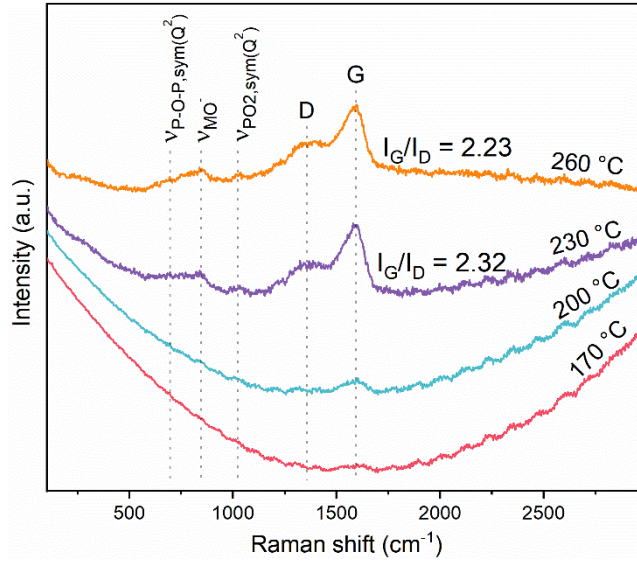

**Figure S3.** Raman spectra of FA-APP@ZnO calcined at different temperatures.

**Text S1.**

The hydrolysis reaction of polyphosphates consists of the following steps (eqs 1 and 2).<sup>2</sup>

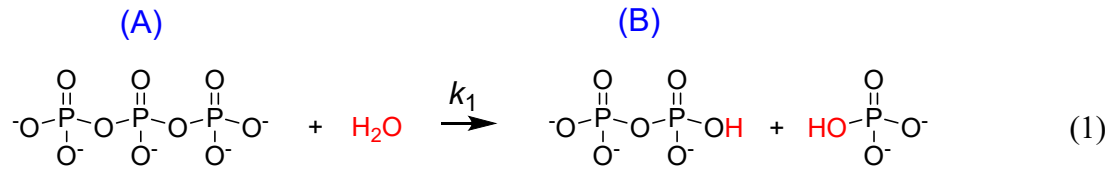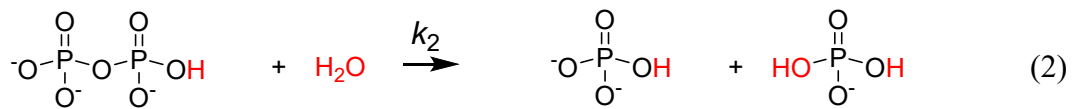

The  $\text{P}_3\text{O}_{10}^{5-}$  hydrolysis (eq 1) and  $\text{P}_2\text{O}_7^{4-}$  hydrolysis (eq 2) are both regarded as the one-order reactions. Their reaction rate,  $r_1$  and  $r_2$  ( $\text{mol m}^{-3} \text{d}^{-1}$ ), can be expressed by the concentration of  $\text{P}_3\text{O}_{10}^{5-}$  and  $\text{P}_2\text{O}_7^{4-}$  respectively, as indicated in eqs 3-6.

$$r_1 = k_1 C_A \quad (3)$$

$$r_2 = k_2 C_B \quad (4)$$

$$dC_A/dt = -k_1C_A \quad (5)$$

$$dC_B/dt = k_1C_A - k_2C_B \quad (6)$$

here,  $C_A$  ( $\text{mol m}^{-3}$ ) is the concentration of  $\text{P}_3\text{O}_{10}^{5-}$  and  $C_B$  ( $\text{mol m}^{-3}$ ) represents the concentration of  $\text{P}_2\text{O}_7^{4-}$ .  $k_1$  ( $\text{d}^{-1}$ ) and  $k_2$  ( $\text{d}^{-1}$ ) are the kinetic constants of eqs 3 and 4, respectively.

$x_1$  is then used to represent the conversion rate of  $\text{P}_3\text{O}_{10}^{5-}$ , while  $x_2$  represents the yield of  $\text{P}_2\text{O}_7^{4-}$  to  $\text{P}_3\text{O}_{10}^{5-}$ .  $C_{A,0}$ , and  $C_{B,0}$  ( $\text{mol m}^{-3}$ ) represent the initial concentration of  $\text{P}_3\text{O}_{10}^{5-}$  and  $\text{P}_2\text{O}_7^{4-}$  respectively, yielding eqs 7 and 8.

$$dx_1/dt = k_1(1 - x_1) \quad (7)$$

$$dx_2/dt = k_1(1 - x_1) - k_2(C_{B,0}/C_{A,0} + x_2) \quad (8)$$

The kinetic experiments acquired the change in  $x_1$  and  $x_2$  as a function of hydrolytic environment (free or absorbed state), pH, and time (Table S1) *via* IC analysis (Figure 6, and 7). The Levenberg–Marquardt method was used to fit the kinetic data. As a result, the values of  $k_1$ ,  $k_2$  at various pH were calculated and displayed in Table S2.

**Table S1.** Results of kinetics experiments during APP hydrolysis.

| Hydrolysis environment | pH            | Hydrolysis time (d) | P <sub>3</sub> O <sub>10</sub> <sup>5-</sup> conversion, $x_1$ | P <sub>2</sub> O <sub>7</sub> <sup>4-</sup> yield, $x_2$ |
|------------------------|---------------|---------------------|----------------------------------------------------------------|----------------------------------------------------------|
| Free state             | 2.50          | 3                   | 0.082 ± 0.031*                                                 | 0.088 ± 0.044                                            |
|                        |               | 9                   | 0.239 ± 0.036                                                  | 0.232 ± 0.041                                            |
|                        |               | 18                  | 0.454 ± 0.029                                                  | 0.445 ± 0.046                                            |
|                        |               | 26                  | 0.540 ± 0.038                                                  | 0.454 ± 0.031                                            |
|                        |               | 36                  | 0.631 ± 0.041                                                  | 0.289 ± 0.035                                            |
|                        |               | 46                  | 0.717 ± 0.037                                                  | 0.123 ± 0.033                                            |
|                        |               | 54                  | 0.755 ± 0.042                                                  | -0.173 ± 0.039                                           |
|                        |               | 62                  | 0.810 ± 0.032                                                  | -0.297 ± 0.049                                           |
|                        |               | 72                  | 0.857 ± 0.031                                                  | -0.470 ± 0.043                                           |
|                        | 90            | 0.923 ± 0.039       | -0.625 ± 0.037                                                 |                                                          |
|                        | 4.50          | 3                   | 0.007 ± 0.022                                                  | -0.007 ± 0.031                                           |
|                        |               | 9                   | 0.066 ± 0.027                                                  | 0.051 ± 0.032                                            |
|                        |               | 18                  | 0.193 ± 0.032                                                  | 0.166 ± 0.029                                            |
|                        |               | 26                  | 0.314 ± 0.050                                                  | 0.214 ± 0.041                                            |
|                        |               | 36                  | 0.411 ± 0.039                                                  | 0.353 ± 0.038                                            |
|                        |               | 46                  | 0.539 ± 0.044                                                  | 0.409 ± 0.035                                            |
|                        |               | 54                  | 0.620 ± 0.036                                                  | 0.464 ± 0.028                                            |
|                        |               | 62                  | 0.707 ± 0.041                                                  | 0.534 ± 0.042                                            |
| 72                     |               | 0.786 ± 0.039       | 0.556 ± 0.041                                                  |                                                          |
| Absorbed state         | 3.50          | 3                   | 0.593 ± 0.072                                                  | 0.155 ± 0.080                                            |
|                        |               | 9                   | 0.876 ± 0.076                                                  | 0.206 ± 0.081                                            |
|                        |               | 18                  | 1.000 ± 0.081                                                  | -0.040 ± 0.077                                           |
|                        |               | 26                  | 1.000 ± 0.000                                                  | -0.314 ± 0.088                                           |
|                        |               | 36                  | 1.000 ± 0.000                                                  | -0.620 ± 0.087                                           |
|                        |               | 46                  | 0.957 ± 0.084                                                  | -0.684 ± 0.078                                           |
|                        |               | 54                  | 1.000 ± 0.000                                                  | -0.980 ± 0.075                                           |
|                        |               | 62                  | 1.000 ± 0.000                                                  | -1.209 ± 0.086                                           |
|                        |               | 72                  | 1.000 ± 0.000                                                  | -1.236 ± 0.087                                           |
|                        | 90            | 1.000 ± 0.000       | -1.279 ± 0.093                                                 |                                                          |
|                        | 5.50          | 3                   | 0.282 ± 0.067                                                  | -0.821 ± 0.077                                           |
|                        |               | 9                   | 0.472 ± 0.074                                                  | -1.060 ± 0.071                                           |
|                        |               | 18                  | 0.433 ± 0.078                                                  | -1.072 ± 0.068                                           |
|                        |               | 26                  | 0.507 ± 0.087                                                  | -1.040 ± 0.085                                           |
|                        |               | 36                  | 0.681 ± 0.089                                                  | -1.067 ± 0.088                                           |
|                        |               | 46                  | 0.674 ± 0.074                                                  | -1.002 ± 0.076                                           |
|                        |               | 54                  | 0.741 ± 0.079                                                  | -1.018 ± 0.078                                           |
|                        |               | 62                  | 0.810 ± 0.082                                                  | -1.034 ± 0.073                                           |
| 72                     |               | 0.967 ± 0.069       | -1.060 ± 0.075                                                 |                                                          |
| 90                     | 1.000 ± 0.080 | -1.279 ± 0.086      |                                                                |                                                          |

0.082 ± 0.031\*: Each experiment was carried out in duplicate under identical conditions.

**Table S2.** Experimental reaction rate constants for the two-step hydrolyzation.

| Hydrolysis environment | pH   | $k_1$ ( $10^{-2} \cdot d^{-1}$ ) | $k_2$ ( $10^{-2} \cdot d^{-1}$ ) |
|------------------------|------|----------------------------------|----------------------------------|
| Free state             | 2.50 | 4.080                            | 1.322                            |
|                        | 4.50 | 1.693                            | 0.143                            |
| Absorbed state         | 3.50 | 19.82                            | 3.888                            |
|                        | 5.50 | 3.136                            | 28.84                            |

A comparison between the calculated and experimental values is shown in Figure S4 and S5. It can be seen the model has high predictive accuracy and kinetic constants calculated are reliable, especially for a span of dozens of days.

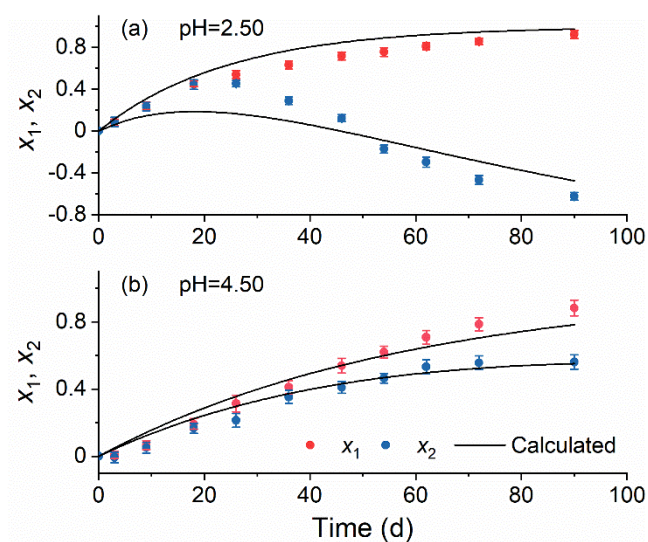

**Figure S4.** Experimental and calculated values of  $P_3O_{10}^{5-}$  conversion,  $x_1$  and  $P_2O_7^{4-}$  yield,  $x_2$  versus time for free state: (a) pH=2.50, and (b) pH=4.50.

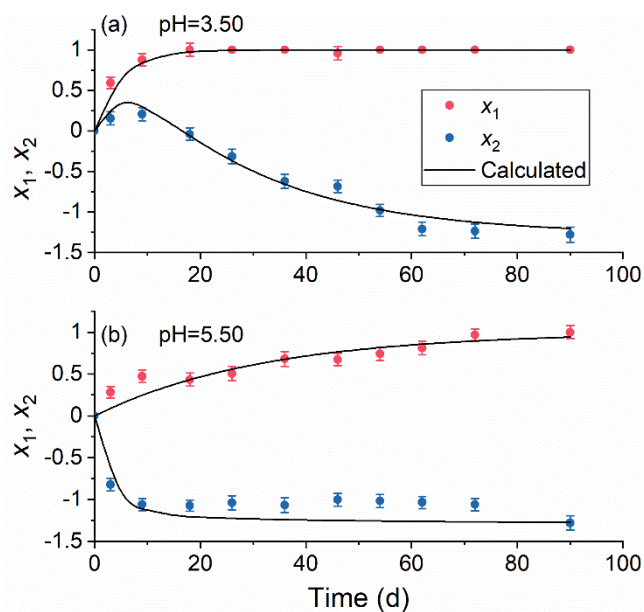

**Figure S5.** Experimental and calculated values of  $P_3O_{10}^{5-}$  conversion,  $x_1$  and  $P_2O_7^{4-}$  yield,  $x_2$  versus time for absorbed state: (a) pH=3.50, and (b) pH=5.50.

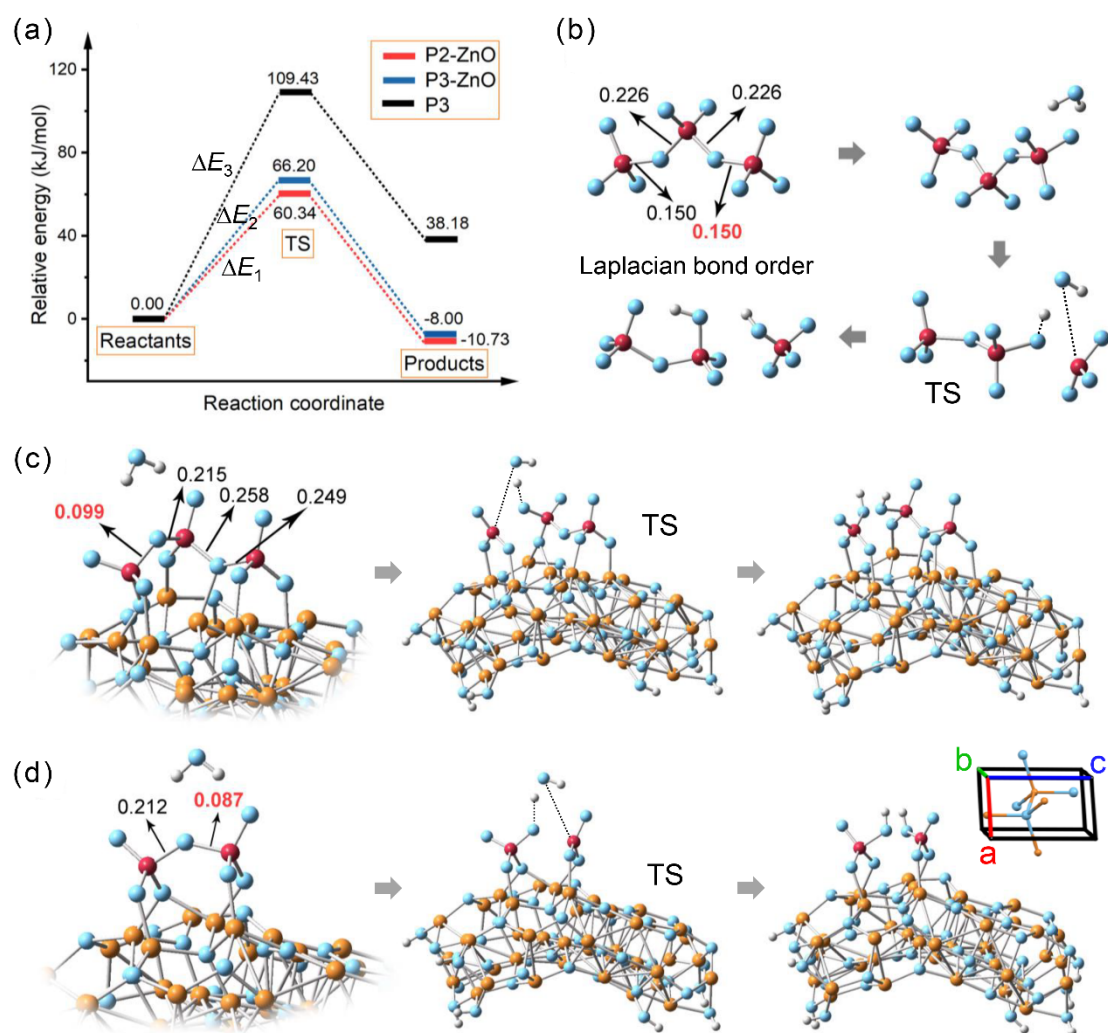

**Figure S6.** (a) DFT-calculated hydrolysis active energies of free and ZnO nanorod

absorbed phosphates. Laplacian bond order distributions and hydrolysis paths of (b) free tripolyphosphate (P3), (c) absorbed tripolyphosphate (P3-ZnO), and (d) absorbed pyrophosphate (P2-ZnO).

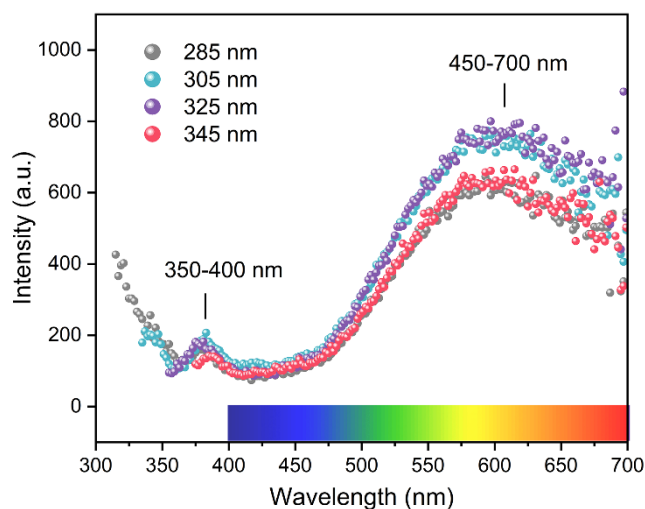

**Figure S7.** PL emission spectra of ZnO nanorods (excitation wavelength from 285 nm to 345 nm).

## REFERENCES

- (1) Kawska, A.; Duchstein, P.; Hochrein, O.; Zahn, D. Atomistic Mechanisms of ZnO Aggregation from Ethanolic Solution: Ion Association, Proton Transfer, and Self-Organization. *Nano Lett.* **2008**, *8*, 2336-2340. <https://doi.org/10.1021/nl801169x>
- (2) Williard, J. W.; Farr, T. D.; Hatfield, J. D. Hydrolysis of Ammonium Pyro-, Tripoly-, and Tetrapolyphosphate at 25°C and 50°C. *J. Chem. Eng. Data* **1975**, *20*, 276-283. <https://doi.org/10.1021/jc60066a012>
